# Supplementary material for: A stable and visualized fatty acid-based phase transition material constructed by solid-phase molecular self-assembly for thermal management
Source: Royal Society of Chemistry journal article supplement (doi:10.1039/d4ra03966a), 2024-01-01
Supplement: d4ra03966a1.pdf [file d4ra03966a1.pdf]

## Supporting Information

### Stable and Visualized Fatty Acid-based Phase Transition Materials Constructed by Solid-phase Molecular Self-assembly for Thermal Management

Chunda Ji<sup>1\*</sup>, Jianbin Huang<sup>1</sup> and Yun Yan<sup>1</sup>

1. Beijing National Laboratory for Molecular Sciences (BNLMS), College of Chemistry and Molecular Engineering, Peking University, Beijing 100871, China

#### Materials and Methods

**Materials.** Sodium dodecyl benzene sulfonate (SDBS, >98%) and polydiallyldimethylammonium chloride (PDDA, Mw 70,000, 20<sub>wt</sub>% in water) were purchased from the Sigma-Aldrich Corporation. Palmitic acid (PA, >98%) and other fatty acids were obtained from Aladdin Reagent Ltd. All reagents were AR grade. Deionized water (18.2 MΩ·cm) was obtained from the ELGA PURELAB classic system.

**Preparation of P-S/PA.** Stable and visualized fatty acid-based phase transition materials P-S/PA were constructed by solid-phase molecular self-assembly. PDDA (0.1mol/L, 10mL) and SDBS (0.1mol/L, 10mL) solutions are heated to 70°C, separately; PA (0.5g, 2mmol) was gradually added to SDBS solution with constant stirring to be emulsified. After continuous mixing for 0.5h, the PDDA solution was poured into the SDBS/PA solution, and the precipitates formed immediately, through electrostatic interaction. The precipitates were collected after centrifuging for 5 min at 8000 rpm. P-S/PA was prepared, by pressing the precipitates, and it can be processed into any shape, by hot-pressing. Here, the PDDA-SDBS/PA was denoted as P-S/PAX, where x represents the molar ratio of PA to SDBS.

**Characterization and Measurements.** Scanning electron microscopy (SEM, Hitachi S-4800) was employed to observe the morphology of the P-S/PA at an acceleration voltage of 1kV. Two-dimensional (2D) wide-angle X-ray scattering (WAXS) of P-S/PA were obtained by using a Ganesha system (SAXSLAB, US) equipped with a multilayer focused Cu Kα radiation as the X-ray source (Genix 3D Cu ULD) and a semiconductor with LaB<sub>6</sub> for the wide-angle region and silver behenate for the small-angle region. X-ray diffraction (XRD) measurements were taken using a Rigaku Dmax-2400 diffractometer with Cu Kα radiation. The content of PA was obtained by TG analysis, the experiments were carried out under nitrogen flow on a TA Instrument Q600 SDT at a heating rate of 10°C/min. The phase transition of P-S/PA was measured by the differential scanning calorimeter (DSC, Q2000) at a heating/cooling rate of 10°C/min. The thermal energy storage/release behavior of P-S/PA was characterized by an infrared thermal imaging camera (FLIR T620). Visualization of the P-S/PA phase transition was characterized by UV-vis transmission spectrum (Shimadzu UV-1800 ultraviolet-visible spectrophotometer using the transmission mode).

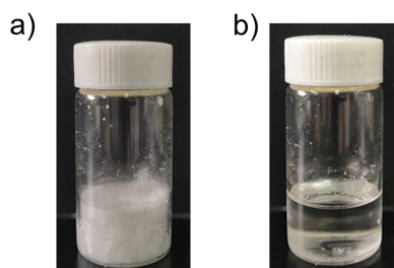

Figure S1 Photographs of PA a) crystallization; b) melting

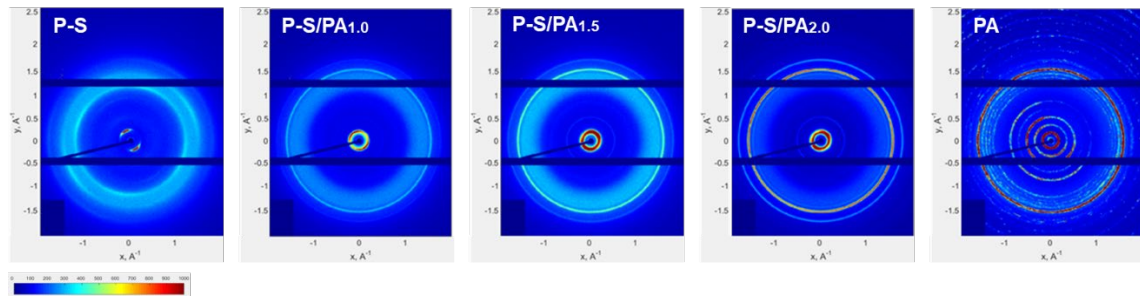

Figure S2 2D-WAXS pattern of P-S/PA with different PA content

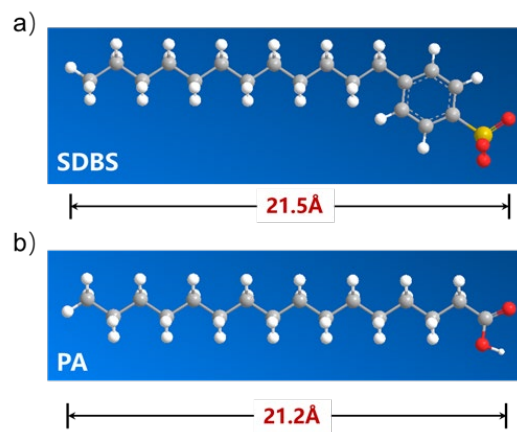

Figure S3 The extending length of a) SDBS; b) PA

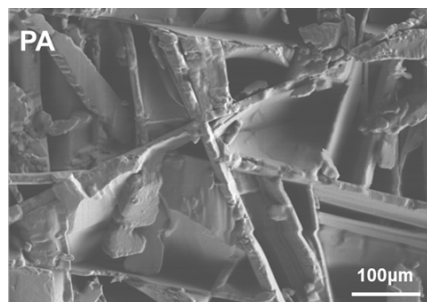

Figure S4 SEM image of PA

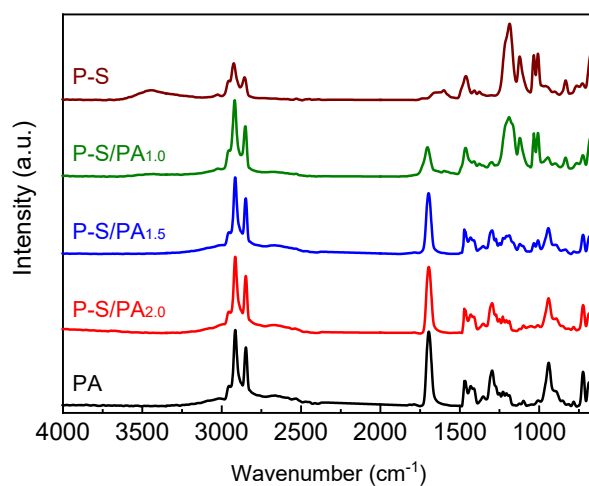

Figure S5 FT-IR spectra of P-S/PA with different PA content

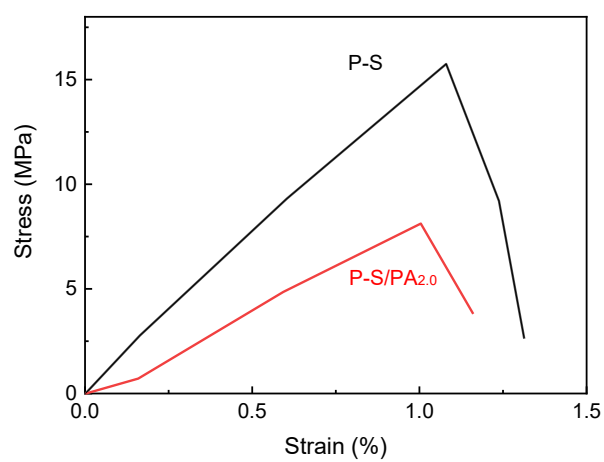

Figure S6 Stress-strain curves of P-S and P-S/PA

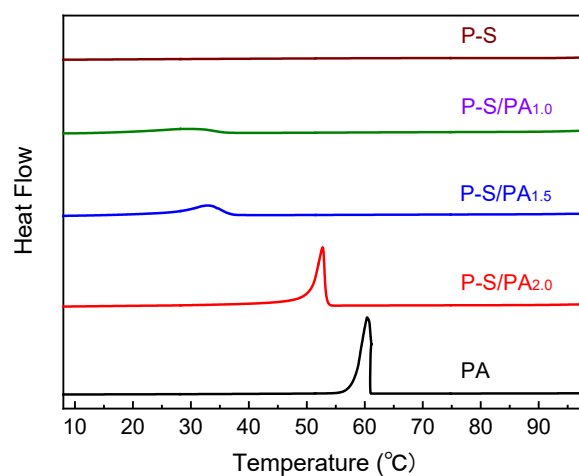

Figure S7 DSC cooling curves of P-S/PA with different PA content

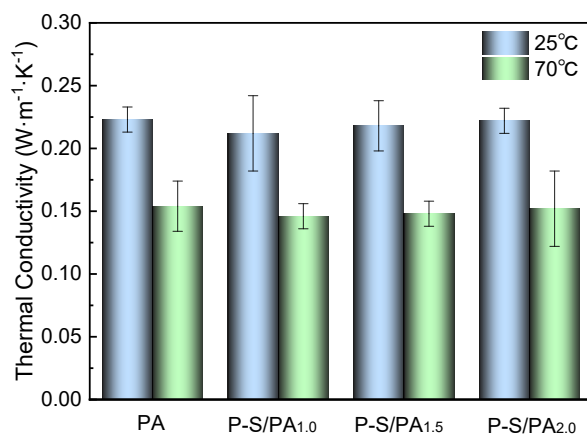

Figure S8 Thermal conductivity of pure PA and P-S/PA with different PA content

Table S1 Thermal performances of P-S/fatty acids with different carbon chain length

| P-S/ | Melting process   |      |                     |       | Crystallization process |      |                     |       |
|------|-------------------|------|---------------------|-------|-------------------------|------|---------------------|-------|
|      | T <sub>M</sub> °C |      | ΔH <sub>M</sub> J/g |       | T <sub>C</sub> °C       |      | ΔH <sub>C</sub> J/g |       |
|      | 0                 | 1000 | 0                   | 1000  | 0                       | 1000 | 0                   | 1000  |
| LA   | 40.7              | 40.5 | 94.6                | 94.2  | 32.6                    | 32.4 | 90.5                | 89.8  |
| MA   | 52.6              | 52.4 | 101.3               | 100.5 | 46.1                    | 46.0 | 96.4                | 95.8  |
| PA   | 60.5              | 60.2 | 107.3               | 106.8 | 52.7                    | 52.4 | 108.8               | 99.6  |
| SA   | 67.5              | 67.4 | 103.2               | 102.8 | 60.8                    | 60.5 | 101.2               | 100.7 |

Table S2 Thermal performances of P-S/PA after remolding

| P-S/PA   | Melting process   |                     | Crystallization process |                     |
|----------|-------------------|---------------------|-------------------------|---------------------|
|          | T <sub>M</sub> °C | ΔH <sub>M</sub> J/g | T <sub>C</sub> °C       | ΔH <sub>C</sub> J/g |
| Original | 60.5              | 107.3               | 52.7                    | 100.2               |
| Remolded | 60.4              | 106.8               | 52.2                    | 99.8                |
